# Supplementary material for: A Cross-Sectional Study Examining Differences in Indication for Cesarean Delivery by Race/Ethnicity
Source: MDPI journal article supplement (doi:10.3390/healthcare9020159), 2021-02-03
Supplement: s1 [file s1]

## Supplementary File

**Table S1. Overadjusted multivariate model examining the association between race/ethnicity and subjective indication for cesarean delivery (N=619)**

| Variable                     | Subjective indication |              |        |
|------------------------------|-----------------------|--------------|--------|
|                              | aOR <sup>a</sup>      | 95% CI       | P      |
| Race/ethnicity               |                       |              |        |
| Micronesian                  | 3.091                 | 1.633-5.850  | 0.001  |
| White                        | <i>ref</i>            |              |        |
| Age                          |                       |              |        |
| (continuous)                 | 0.994                 | 0.955-1.036  | 0.788  |
| Parity                       |                       |              |        |
| 0                            | 18.532                | 8.338-41.189 | <0.001 |
| 1                            | 1.801                 | 0.842-3.852  | 0.129  |
| 2                            | 0.518                 | 0.218-1.233  | 0.137  |
| ≥3                           | <i>ref</i>            |              |        |
| Diabetes                     |                       |              |        |
| Yes                          | 1.488                 | 0.754-2.936  | 0.252  |
| No                           | <i>ref</i>            |              |        |
| Hypertension                 |                       |              |        |
| Yes                          | 1.603                 | 0.781-3.290  | 0.198  |
| No                           | <i>ref</i>            |              |        |
| Birth weight                 |                       |              |        |
| By 100g (continuous)         | 1.094                 | 1.056-1.133  | <0.001 |
| Maternal BMI                 |                       |              |        |
| >35 (obese)                  | 1.011                 | 0.976-1.047  | 0.531  |
| <35                          | <i>ref</i>            |              |        |
| Initiation of prenatal care  |                       |              |        |
| 1st trimester                | <i>ref</i>            |              |        |
| 2nd trimester                | 0.913                 | 0.532-1.567  | 0.742  |
| 3rd trimester                | 1.495                 | 0.789-2.831  | 0.217  |
| Maternal education           |                       |              |        |
| High school graduate or less | <i>ref</i>            |              |        |
| Some college                 | 0.454                 | 0.256-0.803  | 0.007  |
| ≥4 years of college          | 0.300                 | 0.129-0.698  | 0.005  |

Abbreviation: aOR: adjusted odds ratio

<sup>a</sup> Odds ratios calculated by multivariable logistic regression and adjusted for each of the other covariates listed in the table
